# Supplementary material for: Orange-emissive N,S-co-doped carbon dots for label-free and sensitive fluorescence assay of vitamin B12
Source: Royal Society of Chemistry journal article supplement (doi:10.1039/d1nj04706j), 2021-11-30
Supplement: d1nj04706j1.pdf [file d1nj04706j1.pdf]

## Orange emissive N,S-codoped carbon dots for label-free and sensitive fluorescence assay of vitamin B<sub>12</sub>

Pengfei Fan<sup>1,2</sup>, Can Liu<sup>1,2</sup>, Congcong Hu<sup>1,2</sup>, Feifei Li<sup>1</sup>, Xi Lin<sup>1</sup>, Fubing Xiao<sup>1,2</sup>, Hao  
Liang<sup>1,2</sup>, Le Li<sup>1,2</sup>, Shengyuan Yang<sup>1,2\*</sup>

1. School of Public Health, Hengyang Medical School, University of South China, Hengyang, Hunan, 421001, People's Republic of China.

2. Hunan Key Laboratory of Typical Environmental Pollution and Health Hazards, Hengyang, Hunan, 421001, People's Republic of China.

\*Corresponding author:

Prof. Shengyuan Yang, E-mail: [yangshyhy@126.com](mailto:yangshyhy@126.com)

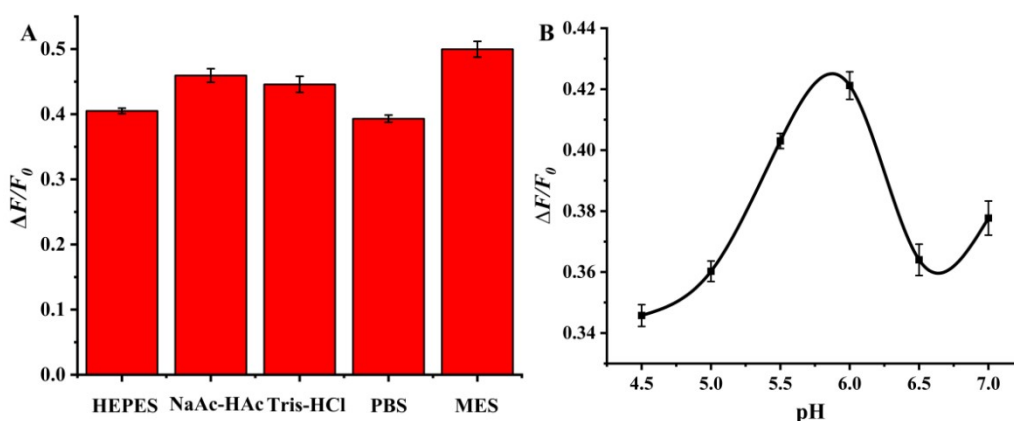

Fig. S1 Effect of types of buffers (A) and pH (B)

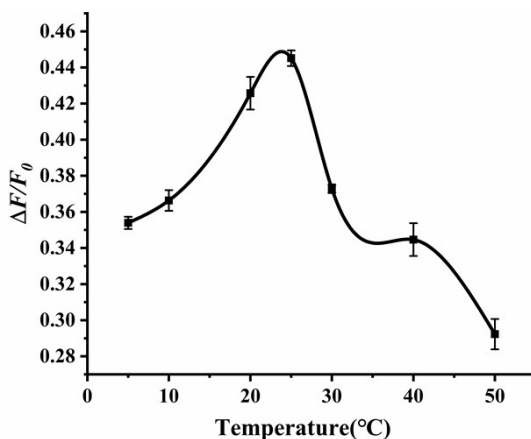

Fig. S2 The influence of temperature to the detection system

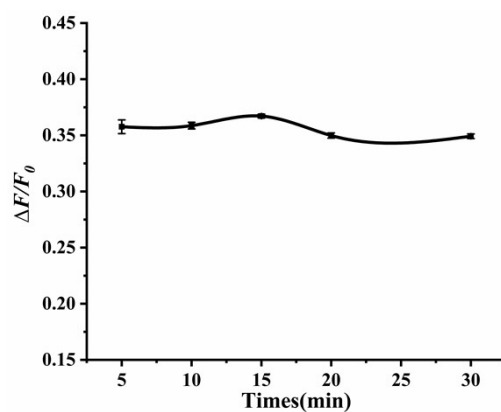

Fig. S3 effect of time on the detection system

Table S1 Comparison of other reported CDs-based sensors for VB<sub>12</sub>

| Materials <sup>a</sup> | Color  | Linear range                     | LOD          | Reference |
|------------------------|--------|----------------------------------|--------------|-----------|
| BCQDs                  | blue   | 0.5 - 3 $\mu$ M                  | 81 nM        | [1]       |
| CDs                    | blue   | 0 - 60 $\mu$ M                   | 0.1 $\mu$ M  | [2]       |
| s-N-CDs                | blue   | 10 - 100 $\mu$ M                 | 2.19 $\mu$ M | [3]       |
| PN-CQDs                | blue   | 2.0 - 31 $\mu$ M                 | 3.0 nM       | [4]       |
| O-CDs                  | orange | 1 - 65 $\mu$ M, 70 - 140 $\mu$ M | 0.62 $\mu$ M | [5]       |
| N,S-CDs                | orange | 0.25 - 20 $\mu$ M                | 77.5 nM      | This work |

<sup>a</sup> BCQDs = biomimetic carbon quantum dots; CDs = carbon dots; s-N-CDs = saccharomyces-derived N-doped carbon dots; PN-CQDs = Phosphorus and nitrogen dually-doped carbon quantum dots; O-CDs = orange emission fluorescent multifunctional carbon dots.

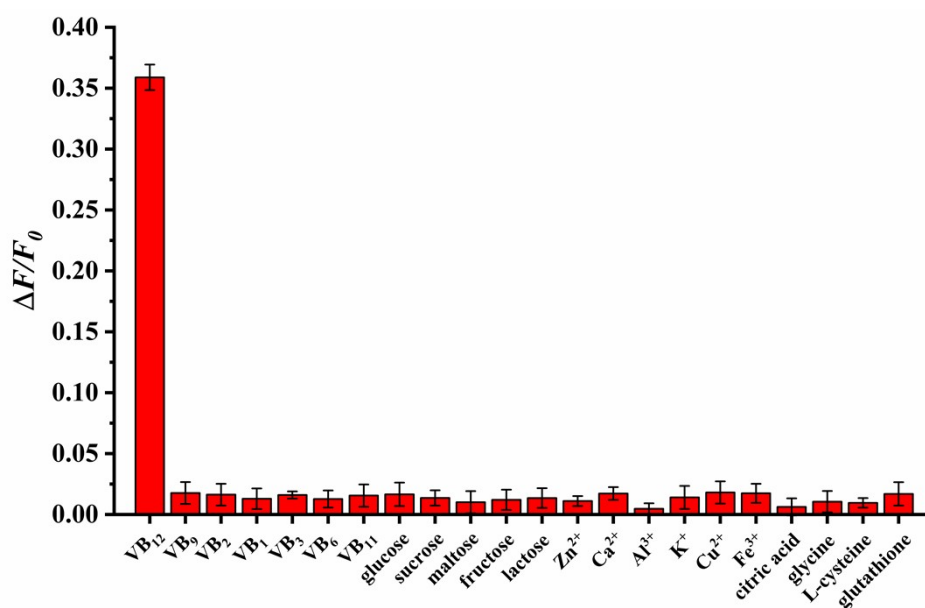

Fig. S4 The selectivity of N,S-CDs toward VB<sub>12</sub>

## Reference

- [1] M.Q. Wang, Y.J. Liu, G.H. Ren, W.G. Wang, S.S. Wu and J. Shen, *Anal. Chim. Acta*, 2018, **1032**, 154-162.
- [2] L. Ding, H. Yang, S. Ge and J. Yu, *Spectrochim. Acta A Mol. Biomol. Spectrosc.*, 2018, **193**, 305-309.
- [3] Y. Yu, C.G. Li, C.L. Chen, H. Huang, C. Liang, Y. Lou, X.B. Chen, Z. Shi and S.H. Feng, *Talanta*, 2019, **195**, 117-126.
- [4] L. Zhang, H.P. Wang, Q. Hu, X.Q. Guo, L. Li, S.M. Shuang, X.J. Gong and C. Dong, *Mikrochim. Acta*, 2019, **186**, 506.
- [5] Y.T. Meng, Y. Jiao, Y. Zhang, W.J. Lu, X.D. Wang, S.M. Shuang and C. Dong, *J. Hazard. Mater.*, 2021, **408**, 124422.
